# Supplementary material for: Maternal embryonic leucine zipper kinase enhances gastric cancer progression via the FAK/Paxillin pathway
Source: Springer Nature journal article supplement (doi:10.1186/1476-4598-13-100), 2014-05-04

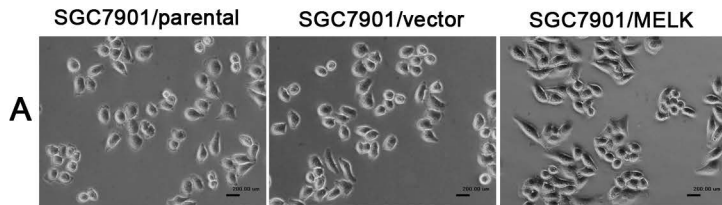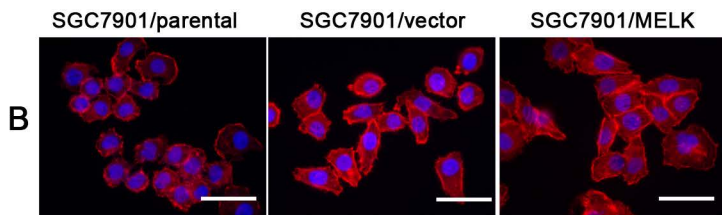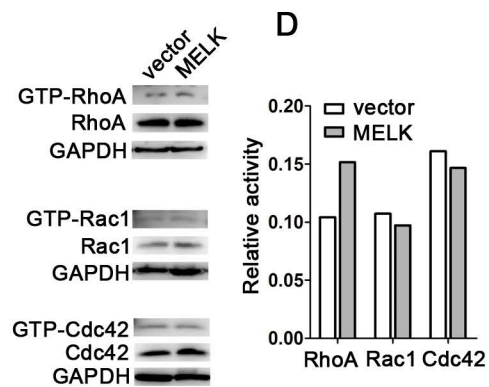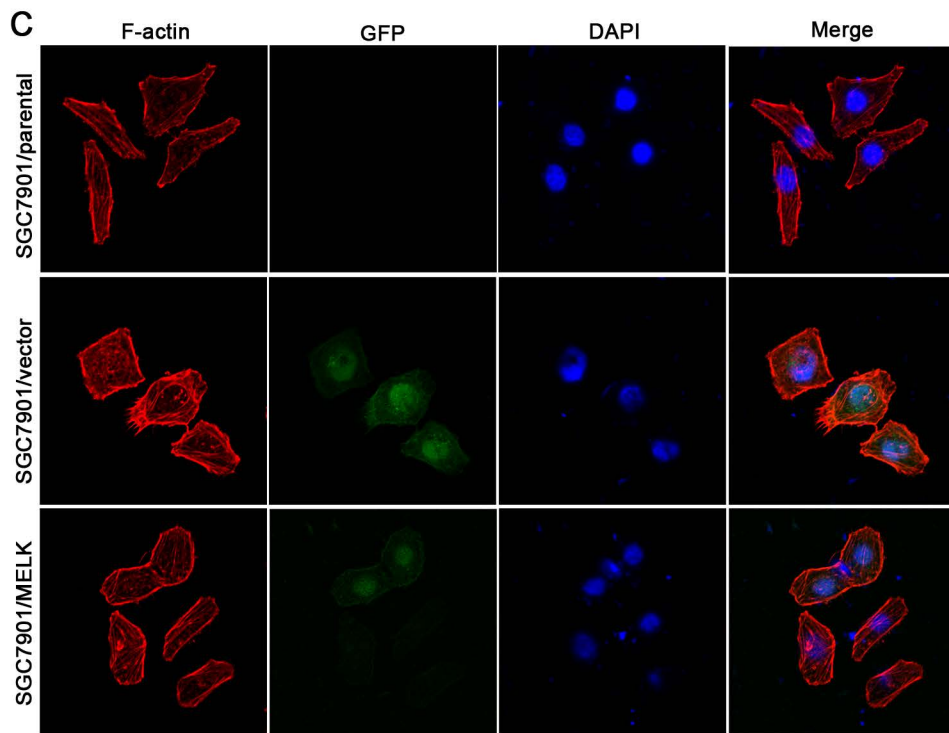

Supplement: 12943_2013_1301_MOESM4_ESM.pdf [file 12943_2013_1301_MOESM4_ESM.pdf]
